# Supplementary material for: Long-Term Medical Resource Consumption between Surgical Clipping and Endovascular Coiling for Aneurysmal Subarachnoid Hemorrhage: A Propensity Score–Matched, Nationwide, Population-Based Cohort Study
Source: MDPI journal article supplement (doi:10.3390/ijerph18115989), 2021-06-02
Supplement: s1 [file s1]

**Table S1.** Demographic and clinical parameters of patients with ruptured intracranial aneurysms before propensity score-matched.

|                          |                         | Endovascular coil embolization<br>N=4,700 |               | Surgical clipping<br>N=6,109 |               | P Value |
|--------------------------|-------------------------|-------------------------------------------|---------------|------------------------------|---------------|---------|
|                          |                         | n                                         | (%)           | n                            | (%)           |         |
| Age                      | Mean (SD)               | 57.9                                      | (13.9)        | 56.9                         | (13.0)        | <0.0001 |
|                          | Median (Q1-Q3)          | 58                                        | (49 - 68)     | 57                           | (48 - 66)     |         |
|                          | 20-64                   | 3163                                      | (67.3)        | 4399                         | (72.0)        | <0.0001 |
|                          | 65-74                   | 894                                       | (19.0)        | 1092                         | (17.9)        |         |
|                          | 75-84                   | 544                                       | (11.6)        | 556                          | (9.1)         |         |
| Gender                   | 85+                     | 99                                        | (2.1)         | 62                           | (1.0)         | 0.6628  |
|                          | Male                    | 1741                                      | (37.0)        | 2238                         | (36.6)        |         |
|                          | Female                  | 2959                                      | (63.0)        | 3871                         | (63.4)        |         |
| Treatment year           | 2011                    | 422                                       | ( 9.0)        | 922                          | (15.1)        | <0.0001 |
|                          | Male                    | 155                                       | ( 3.3)        | 338                          | ( 5.5)        |         |
|                          | Female                  | 267                                       | ( 5.7)        | 584                          | ( 9.6)        |         |
|                          | 2012                    | 471                                       | (10.0)        | 879                          | (14.4)        | <0.0001 |
|                          | Male                    | 175                                       | ( 3.7)        | 321                          | ( 5.3)        |         |
|                          | Female                  | 296                                       | ( 6.4)        | 558                          | ( 9.1)        |         |
|                          | 2013                    | 566                                       | (12.0)        | 852                          | (13.9)        | 0.2031  |
|                          | Male                    | 209                                       | ( 4.4)        | 312                          | ( 5.1)        |         |
|                          | Female                  | 357                                       | ( 7.6)        | 540                          | ( 8.8)        |         |
|                          | 2014                    | 668                                       | (14.2)        | 899                          | (14.7)        | 0.5685  |
|                          | Male                    | 247                                       | ( 5.2)        | 321                          | ( 5.2)        |         |
|                          | Female                  | 421                                       | ( 9.0)        | 578                          | ( 9.5)        |         |
|                          | 2015                    | 699                                       | (14.9)        | 848                          | (13.9)        | 0.3684  |
|                          | Male                    | 259                                       | ( 5.5)        | 303                          | ( 5.0)        |         |
|                          | Female                  | 440                                       | ( 9.4)        | 545                          | ( 8.8)        |         |
|                          | 2016                    | 904                                       | (19.2)        | 878                          | (14.4)        | <0.0001 |
|                          | Male                    | 335                                       | ( 7.1)        | 313                          | ( 5.2)        |         |
|                          | Female                  | 569                                       | (12.1)        | 565                          | ( 9.2)        |         |
|                          | 2017                    | 970                                       | (20.6)        | 831                          | (13.6)        | <0.0001 |
|                          | Male                    | 361                                       | ( 7.7)        | 330                          | ( 5.4)        |         |
|                          | Female                  | 609                                       | (12.9)        | 501                          | ( 8.2)        |         |
| Location of aneurysm     | ACA                     | 2309                                      | (49.1)        | 2632                         | (43.1)        | <0.0001 |
|                          | ICA                     | 576                                       | (12.3)        | 635                          | (10.4)        |         |
|                          | MCA                     | 1372                                      | (29.2)        | 2058                         | (33.7)        |         |
|                          | VBA                     | 302                                       | (6.4)         | 484                          | (7.9)         |         |
|                          | PCA                     | 141                                       | (3.0)         | 300                          | (4.9)         |         |
| Diabetes                 | No                      | 3992                                      | (84.9)        | 5338                         | (87.4)        | 0.0002  |
|                          | Yes                     | 708                                       | (15.1)        | 771                          | (12.6)        |         |
| Congestive heart failure | No                      | 4576                                      | (97.4)        | 5994                         | (98.1)        | 0.0081  |
|                          | Yes                     | 124                                       | (2.6)         | 115                          | (1.9)         |         |
| Hypertension             | No                      | 2268                                      | (48.3)        | 3119                         | (51.1)        | 0.0039  |
|                          | Yes                     | 2432                                      | (51.7)        | 2990                         | (48.9)        |         |
| Renal diseases           | End-stage renal disease | 47                                        | (1.0)         | 52                           | (0.9)         | 0.0549  |
|                          | Chronic kidney disease  | 157                                       | (3.3)         | 159                          | (2.6)         |         |
|                          | No renal diseases       | 4496                                      | (95.7)        | 5898                         | (96.5)        |         |
| Stroke or TIA            | No                      | 2678                                      | (57.0)        | 4445                         | (72.8)        | <0.0001 |
|                          | Yes                     | 2022                                      | (43.0)        | 1664                         | (27.2)        |         |
| CCI Scores               | 0                       | 631                                       | (13.4)        | 1970                         | (32.2)        | <0.0001 |
|                          | 1                       | 2771                                      | (59.0)        | 2931                         | (48.0)        |         |
|                          | 2+                      | 1298                                      | (27.6)        | 1208                         | (19.8)        |         |
| Hospital level           | Academic centers        | 3809                                      | (81.0)        | 4255                         | (69.7)        | <0.0001 |
|                          | Nonacademic centers     | 891                                       | (19.0)        | 1854                         | (30.3)        |         |
| Hospital area            | North                   | 2929                                      | (62.3)        | 2625                         | (43.0)        | <0.0001 |
|                          | Center                  | 738                                       | (15.7)        | 1779                         | (29.1)        |         |
|                          | South                   | 915                                       | (19.5)        | 1510                         | (24.7)        |         |
|                          | East                    | 118                                       | (2.5)         | 195                          | (3.2)         |         |
| Income                   | <NTD 18,000             | 1062                                      | (22.6)        | 1344                         | (22.0)        | <0.0001 |
|                          | NTD 18,000-22,500       | 929                                       | (19.8)        | 1554                         | (25.4)        |         |
|                          | NTD 22,500-30,000       | 1068                                      | (22.7)        | 1257                         | (20.6)        |         |
|                          | NTD 30,000+             | 1641                                      | (34.9)        | 1954                         | (32.0)        |         |
| Follow-up time, months   | Mean (SD)               | 54.2                                      | (28.1)        | 50.1                         | (25.6)        | <0.0001 |
|                          | Median (Q1-Q3)          | 53.2                                      | (31.2 - 78.1) | 49.0                         | (30.2 - 69.1) |         |
| All-Cause Death          |                         | 811                                       | (17.3)        | 1366                         | (22.4)        | <0.0001 |
